# Supplementary material
Source: PubMed Central journal article supplement (PMC4308947)
Supplement: NIHMS631414-supplement-supplement_1.pdf [file NIHMS631414-supplement-supplement_1.pdf]

**Supplementary Table.** Linear regression models to predict age, weight, and total adipose tissue-adjusted visceral adipose tissue and intermuscular adipose tissue for females before surgery (T0), at 12 (T12) and 24 (T24) month post-surgery.

|            | Weight (kg) | TAT (kg) | Age (years)               | Intercept | R <sup>2</sup> | SEE (kg) | P-value |
|------------|-------------|----------|---------------------------|-----------|----------------|----------|---------|
| <b>T0</b>  |             |          |                           |           |                |          |         |
| VAT        | 0.018       | 0.048    | 0.00                      | -0.72     | 0.21           | 1.28     | 0.40    |
| IMAT       | -0.013      | 0.063    | -5.496 x 10 <sup>-5</sup> | -0.397    | 0.33           | 0.61     | 0.18    |
| <b>T12</b> |             |          |                           |           |                |          |         |
| VAT        | -0.048      | 0.11     | 0.014                     | 1.155     | 0.58           | 0.57     | 0.01    |
| IMAT       | -0.027      | 0.049    | -0.005                    | 1.9       | 0.27           | 0.37     | 0.28    |
| <b>T24</b> |             |          |                           |           |                |          |         |
| VAT        | -0.023      | 0.064    | 0.031                     | -0.523    | 0.61           | 0.48     | 0.01    |
| IMAT       | 0.008       | 0.011    | 0.011                     | -0.503    | 0.64           | 0.22     | 0.01    |

*TAT* total adipose tissue, *VAT* visceral adipose tissue, *IMAT* intermuscular adipose tissue

R<sup>2</sup>, explained variance; *SEE*, SE of estimate

*n*=16 females
